# Supplementary material for: Loss of MTSS1 results in increased metastatic potential in pancreatic cancer
Source: PubMed Central journal article supplement (PMC5369978; doi:10.18632/oncotarget.14869), 2017-01-27
Supplement: oncotarget-08-16473-s001.pdf [file oncotarget-08-16473-s001.pdf]

# Loss of MTSS1 results in increased metastatic potential in pancreatic cancer

## Supplementary Materials

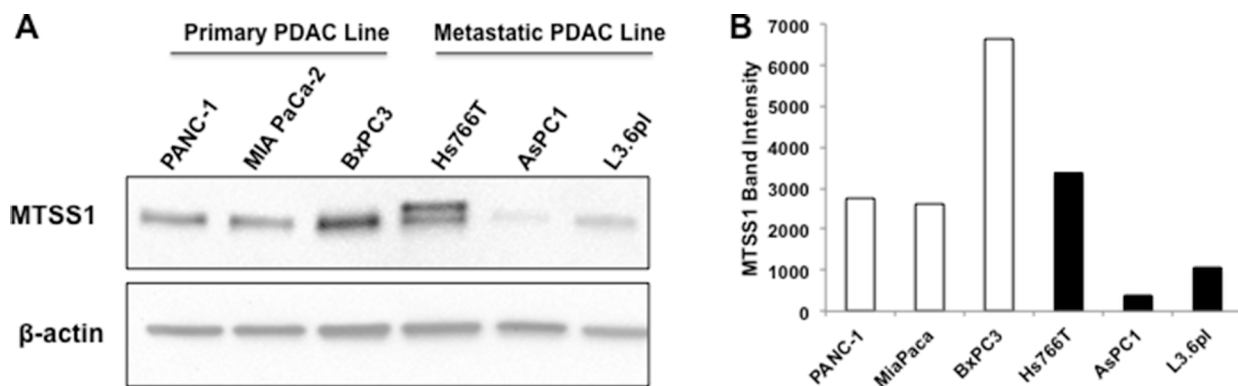

**Supplementary Figure 1: MTSS1 expression is lower in PDAC cell lines derived from primary tumor sites. (A)** Western blot analysis of MTSS1 expression in a panel of PDAC cell lines that were either derived from a primary PDAC cancer site or a metastatic PDAC cancer site. **(B)** Densitometry analysis of PDAC panel western blot for MTSS1 expression levels.

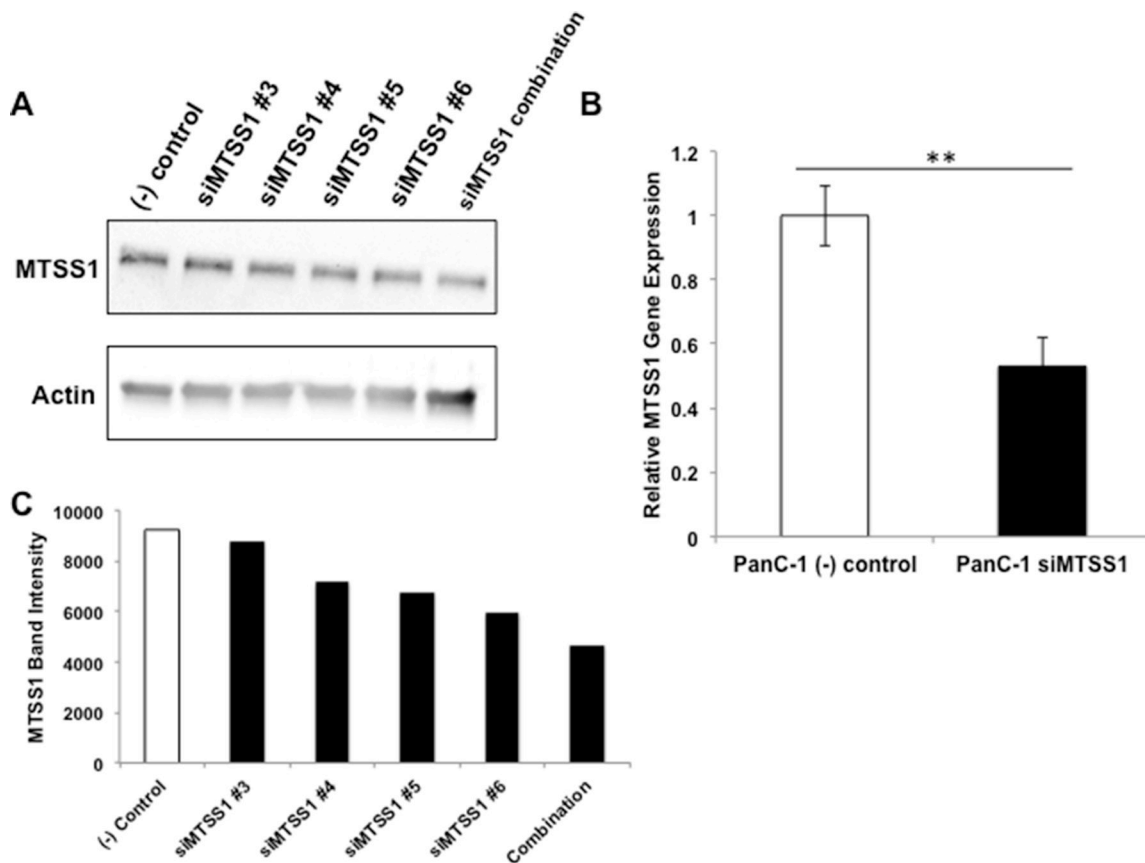

**Supplementary Figure 2: Quantification of MTSS1 knockdown using MTSS1 siRNA combination.** (A) Western blot analysis of PANC-1 cells treated with a panel or combination of MTSS1 siRNA. Greatest knockdown was achieved when using the siMTSS1 combination treatment (~50%), and thus this was the siRNA method used for all transfections. (B) RT-PCR analysis of siRNA knockdown of MTSS1 in PANC-1 cells using siMTSS1 combination treatment. (C) Quantitative analysis of MTSS1 expression during western blot knockdown validation seen in Supplementary Figure 2A. \*\* $p$ -value < 0.001.

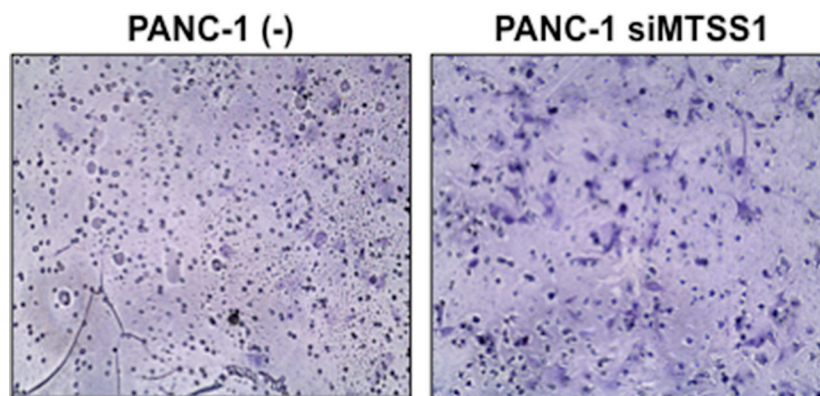

**Supplementary Figure 3: Loss of MTSS1 leads to more cell invasion in a transwell assay.** Representative images of Matrigel-coated transwell migration assay between PANC-1 (-) cells and PANC-1 siMTSS1 cells. Images were taken at 20 $\times$  magnification.

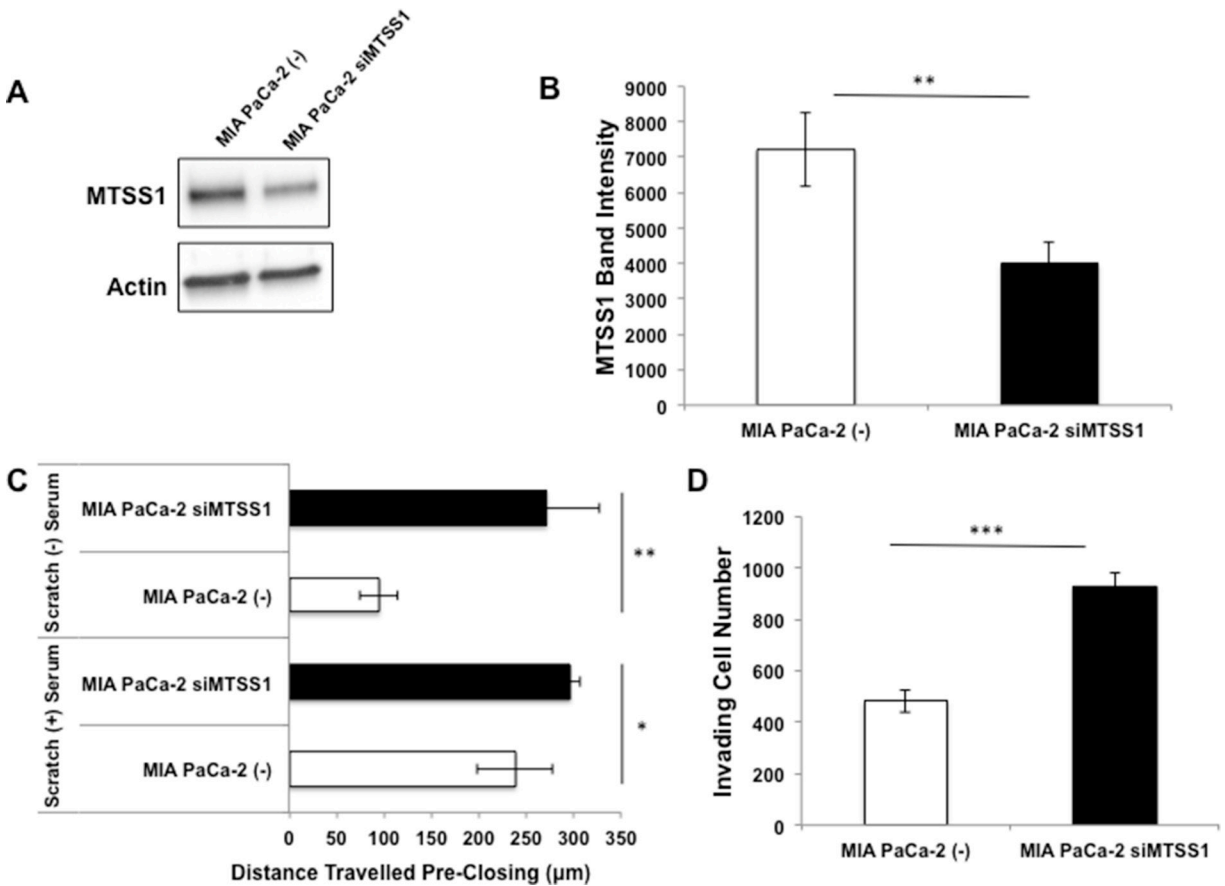

**Supplementary Figure 4: Loss of MTSS1 leads to a more invasive and migratory phenotype in additional primary PDAC cell line.** (A) Western blot confirmation of siMTSS1 knockdown in MIA PaCa-2 cells. (B) Densitometry analysis of western blot data of siMTSS1 knockdown in MIA PaCa-2 cells. (C) Scratch assays were performed in both serum-containing and serum-free conditions with MIA PaCa-2 (-) and MIA PaCa-2 siMTSS1 cells. (D) MIA PaCa-2 (-) and MIA PaCa-2 siMTSS1 cells were plated for a transwell migration assay in the presence of Matrigel, stained with hematoxylin, and counted after 48 hours of incubation.  $**p$ -value < 0.001.

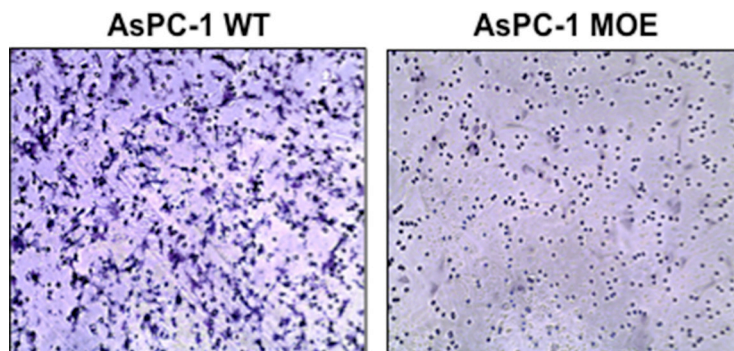

**Supplementary Figure 5: Restoration of MTSS1 in metastatic PDAC cell line results in less cell invasion in a transwell assay.** Representative images of Matrigel-coated transwell migration assay between AsPC-1 WT cells and AsPC-1 MOE cells. Images were taken at 20 $\times$  magnification.

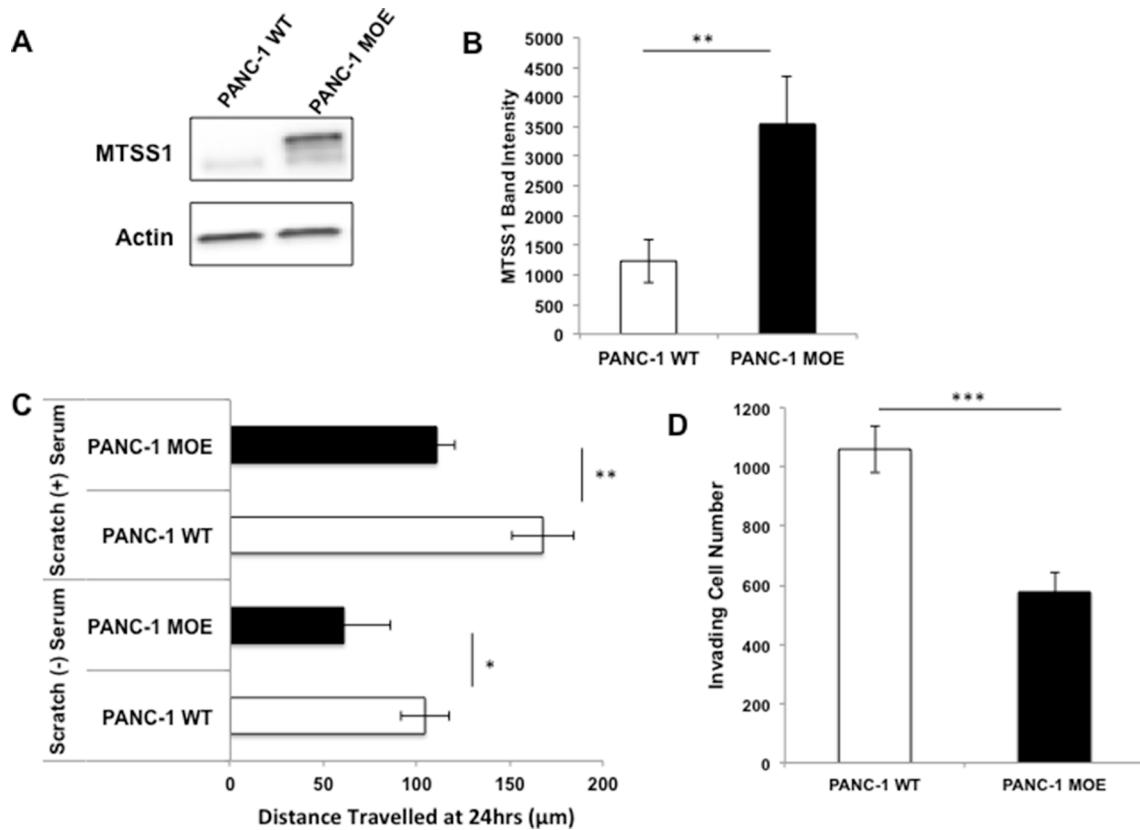

**Supplementary Figure 6: Overexpression of MTSS1 leads to a less invasive and migratory phenotype in additional PDAC cell line.** (A) PANC-1 cells were transduced with MTSS1-Flag plasmid to establish a transient overexpression of MTSS1. (B) Densitometry analysis of western blot data of PANC-1 cells transduced with MTSS1-Flag plasmid. (C) PANC-1 (-) and PANC-1 MOE cells were plated and scratch assays were performed in both serum-containing and serum-free conditions. (D) PANC-1 WT and PANC-1 MOE cells were plated for a transwell migration assay in the presence of Matrigel, stained with hematoxylin, and counted after 48 hours of incubation. \**p*-value < 0.05, \*\**p*-value < 0.001.

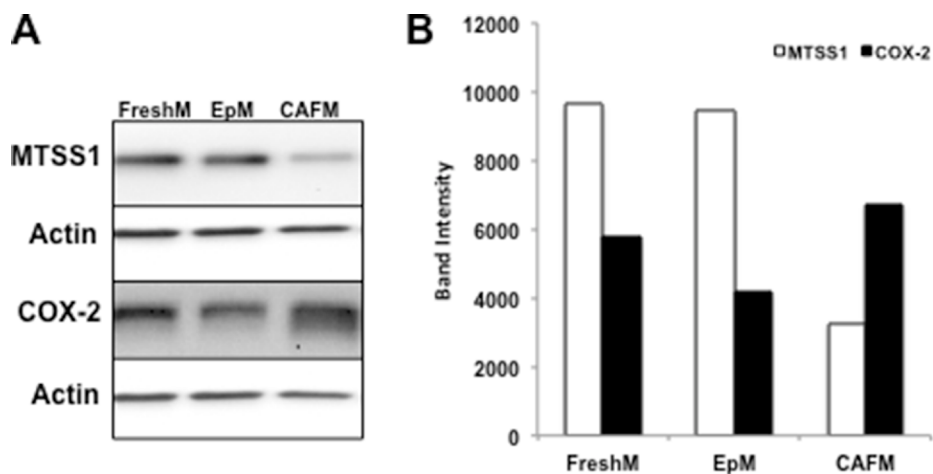

**Supplementary Figure 7: Treatment with CAF-conditioned media leads to decrease in MTSS1 and increase in COX-2 expression in PANC-1 cells.** (A) Western blot analysis of MTSS1 and COX-2 expression in PANC-1 cells treated with either fresh, non-conditioned media (FreshM), EpM, or CAFM for 48 hours before lysate harvest. (B) Densitometric quantification of MTSS1 and COX-2 protein expression levels in PANC-1 cells treated with FreshM, EpM, or CAFM.

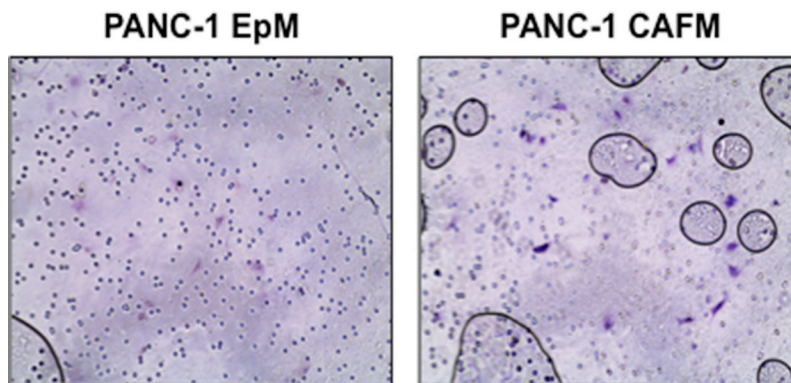

**Supplementary Figure 8: Treatment with CAF-conditioned media leads to more cell invasion in a transwell assay.** Representative images of Matrigel-coated transwell migration assay between PANC-1 cells treated with either EpM-conditioned media or CAFM-conditioned media. Images were taken at 20× magnification.

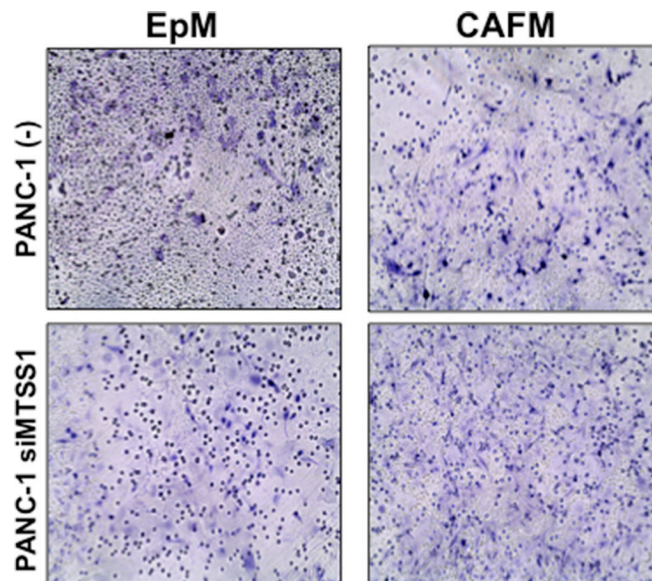

**Supplementary Figure 9: Treatment with both MTSS1 siRNA and CAF-conditioned media results in augmented cell invasion in a transwell assay.** Representative images of Matrigel-coated transwell migration assay between PANC-1 (-) cells and PANC-1 siMTSS1 cells treated with either EpM-conditioned media or CAFM-conditioned media. Images were taken at 20× magnification.

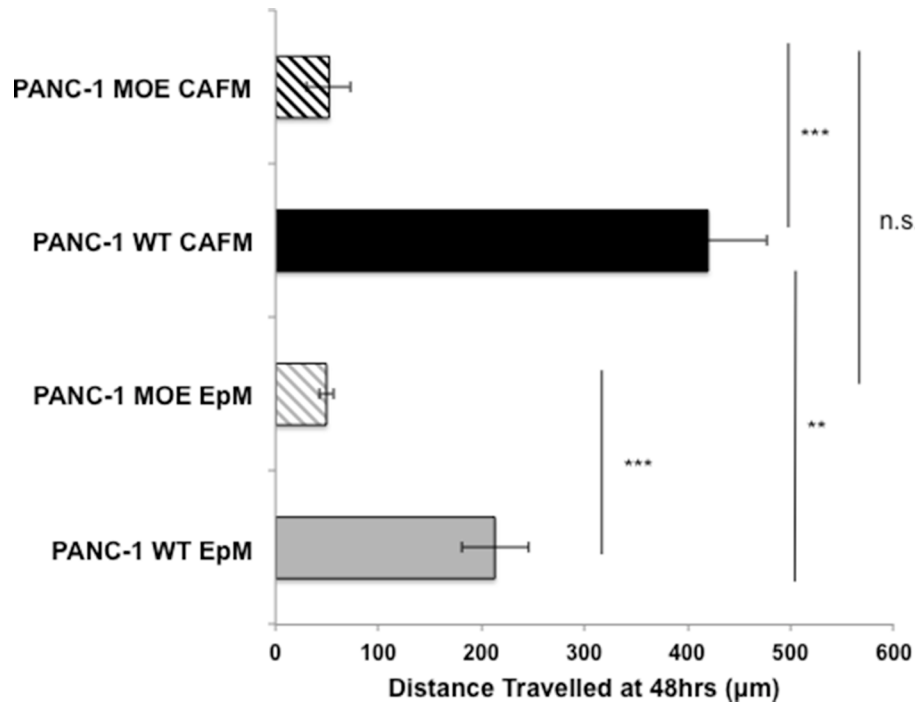

**Supplementary Figure 10: Overexpression of MTSS1 results in decreased invasion and migration capabilities in PANC-1 cells regardless of media treatment.** PANC-1 WT and MOE cells were treated with either EpM or CAFM and subjected to scratch assay analysis. \*\* $p$ -value < 0.001, \*\*\* $p$ -value < 0.0001.

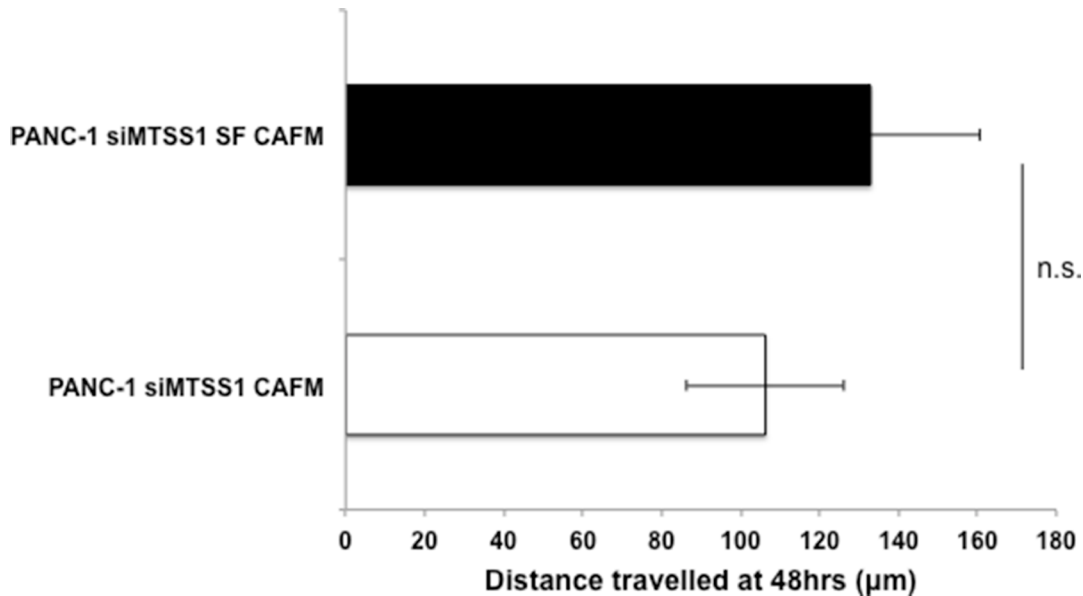

**Supplementary Figure 11: Serum-free CAF-conditioned media does not significantly alter the invasion ability of PANC-1 siMTSS1 cells.** PANC-1 siMTSS1 cells were treated with either serum-free CAF-conditioned media or complete CAF-conditioned media and subjected to scratch assay analysis.

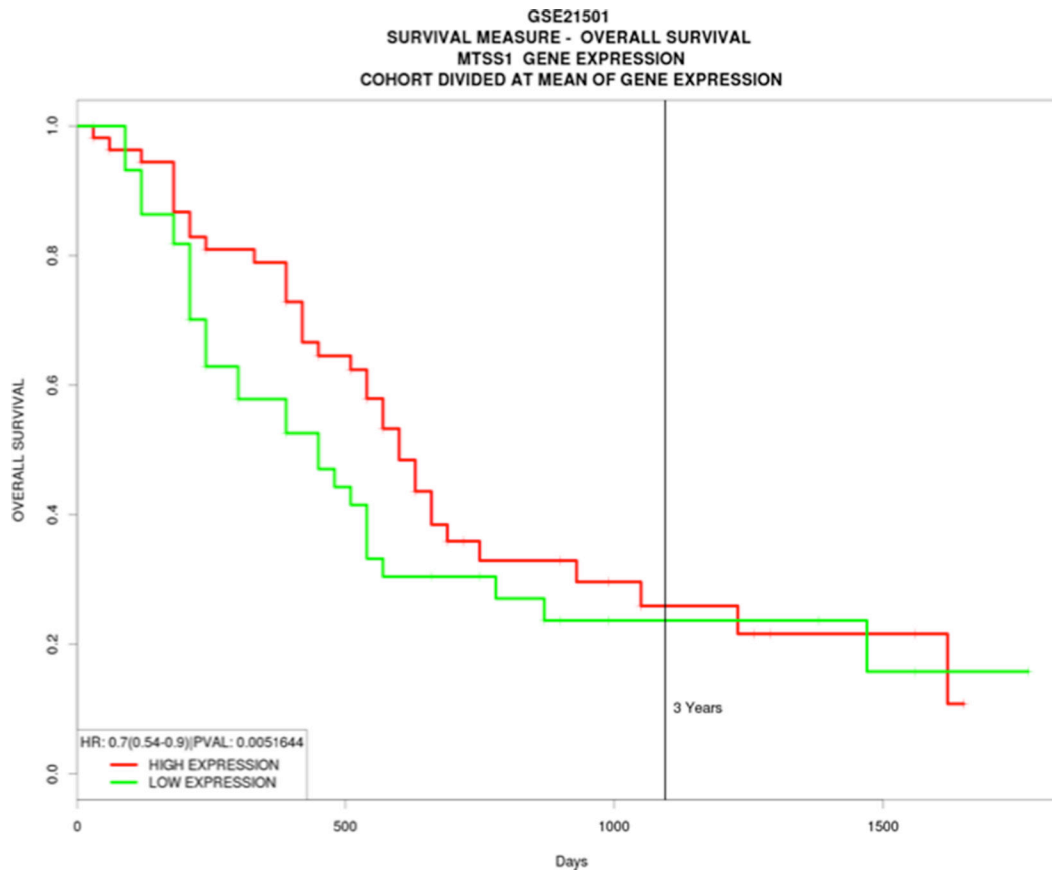

**Supplementary Figure 12: Decreased MTSS1 in PDAC patients is an indicator of poor prognosis.** Kaplan-Meier survival curve of patient data set GSE21501.

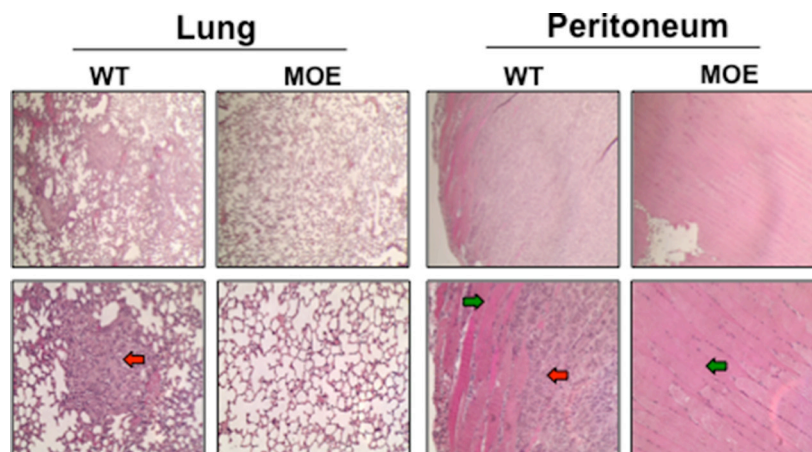

**Supplementary Figure 13: Overexpression of MTSS1 in a metastatic cell line results in less tumor cell invasion *in vivo*.** Representative H&E images of sections from the lungs and peritoneum of WT or MOE-injected mice at day 51. Red arrows indicate cell invasion found in WT tissue samples. Green arrows indicate normal tissue.

**Supplementary Table 1: Differentially Expressed Genes in *Kras*<sup>G12D/+</sup>;*Pten*<sup>lox/+</sup>;*Cox-2* COE mice compared to baseline**

| <b>Gene</b> | <b>Fold Change</b> | <b><i>p</i>-value</b> | <b>Gene</b> | <b>Fold Change</b> | <b><i>p</i>-value</b> |
|-------------|--------------------|-----------------------|-------------|--------------------|-----------------------|
| Rnase1      | -3.57              | 0.03289               | Tmem33      | 2.00               | 0.006699              |
| Dnajb6      | -2.85              | 0.023211              | Ugp2        | 2.00               | 0.015502              |
| Zmynd11     | -2.69              | 0.044665              | Siva1       | 2.04               | 0.001164              |
| Mtss1       | -2.46              | 0.038618              | Wwc1        | 2.17               | 0.049824              |
| Tcf25       | -2.19              | 0.002998              | Dhx32       | 2.23               | 0.003523              |
| Xpot        | -2.01              | 0.036327              | Trove2      | 2.29               | 0.010156              |
|             |                    |                       | Pskh1       | 2.43               | 0.012056              |
|             |                    |                       | Spg20       | 2.43               | 0.009332              |
|             |                    |                       | Tmcc3       | 2.46               | 0.028791              |
|             |                    |                       | Hsd17b11    | 2.50               | 0.024350              |
|             |                    |                       | Tmtc4       | 3.14               | 0.003590              |
